# Supplementary material
Source: MDPI journal article supplement (https://www.mdpi.com/2226-4310/3/4/32)
Supplement: s1 [file s1]

## Sheet: Sheet1
Table S1. T-Motor 16 inch × 5.4 inch Airfoil Coordinates.
r/R
0.17		0.22		0.27		0.32		0.37		0.42		0.47		0.52		0.57		0.62		0.66		0.71		0.76		0.81		0.86		0.91		0.96
1	0	1	0	1	0	1	0	1	0	1	0	1	0	1	0	1	0	1	0	1	0	1	0	1	0	1	0	1	0	1	0	1	0
0.9896	0.007	0.9922	0.0031	0.991	0.003	0.992	0.0022	0.9916	0.0022	0.9912	0.0021	0.9916	0.0019	0.992	0.003	0.991	0.0019	0.991	0.0021	0.9918	0.0019	0.9908	0.0021	0.9914	0.0018	0.9915	0.0022	0.9912	0.0017	0.991	0.0026	0.9903	0.0025
0.9736	0.0165	0.9786	0.0081	0.9754	0.008	0.9791	0.0058	0.9779	0.0056	0.9762	0.0057	0.977	0.0053	0.978	0.007	0.9758	0.0052	0.9761	0.0056	0.9778	0.0051	0.9754	0.0054	0.9768	0.0049	0.977	0.0059	0.976	0.0047	0.9761	0.0066	0.97	0.0075
0.9568	0.025	0.9636	0.0135	0.9562	0.014	0.9648	0.0097	0.9628	0.0094	0.9584	0.0098	0.9593	0.0092	0.963	0.011	0.958	0.0089	0.9593	0.0094	0.9612	0.0087	0.9578	0.0091	0.9594	0.0085	0.96	0.0101	0.9578	0.0083	0.9595	0.0109	0.9482	0.0125
0.9385	0.0327	0.9469	0.0193	0.933	0.0211	0.9488	0.014	0.9461	0.0135	0.9373	0.0146	0.9377	0.0139	0.946	0.016	0.937	0.0131	0.9401	0.0136	0.9412	0.013	0.9375	0.0133	0.9384	0.0128	0.9393	0.0149	0.9353	0.0127	0.9408	0.0155	0.9261	0.0172
0.9183	0.0399	0.9282	0.0255	0.9099	0.0279	0.9308	0.0187	0.9276	0.0179	0.9145	0.0196	0.9155	0.0186	0.927	0.021	0.9151	0.0174	0.9182	0.0182	0.92	0.0174	0.9148	0.0179	0.9165	0.0171	0.9158	0.0201	0.9121	0.0173	0.9197	0.0203	0.904	0.0216
0.8949	0.047	0.9073	0.0322	0.8874	0.0342	0.9104	0.0238	0.9069	0.0228	0.8926	0.0243	0.894	0.0231	0.905	0.026	0.8944	0.0214	0.896	0.0227	0.9001	0.0214	0.893	0.0221	0.8962	0.0211	0.8946	0.0245	0.891	0.0214	0.8966	0.0252	0.8817	0.0256
0.8671	0.0543	0.8842	0.0392	0.8641	0.0405	0.8878	0.0293	0.8846	0.0279	0.8706	0.0288	0.872	0.0275	0.883	0.031	0.8738	0.0252	0.8749	0.0268	0.8803	0.0252	0.8718	0.026	0.8763	0.0248	0.8747	0.0284	0.8706	0.0253	0.8737	0.0296	0.8594	0.0293
0.8336	0.0624	0.8604	0.0461	0.8396	0.0469	0.8656	0.0345	0.8629	0.0327	0.8478	0.0333	0.8489	0.0319	0.862	0.035	0.8526	0.029	0.8542	0.0307	0.86	0.029	0.8506	0.0298	0.8561	0.0285	0.8552	0.032	0.8501	0.0291	0.8513	0.0336	0.8369	0.0328
0.7957	0.0714	0.837	0.0524	0.8157	0.0528	0.8441	0.0394	0.8415	0.0373	0.8243	0.0378	0.8258	0.0362	0.841	0.039	0.8306	0.0328	0.8334	0.0345	0.8385	0.0329	0.8289	0.0336	0.8352	0.0322	0.8357	0.0354	0.8288	0.033	0.8287	0.0374	0.8143	0.0359
0.7575	0.0799	0.8136	0.0585	0.7925	0.0583	0.8226	0.0441	0.8201	0.0417	0.8013	0.042	0.8034	0.0402	0.819	0.043	0.8077	0.0366	0.8121	0.0382	0.8163	0.0367	0.8064	0.0373	0.8129	0.0359	0.8157	0.0387	0.8062	0.0369	0.8055	0.0409	0.7916	0.0389
0.7216	0.0873	0.7895	0.0644	0.7694	0.0635	0.8006	0.0487	0.7983	0.0461	0.7788	0.046	0.7811	0.0441	0.797	0.046	0.7854	0.0402	0.7899	0.0418	0.7946	0.0402	0.783	0.041	0.7897	0.0397	0.7948	0.042	0.7817	0.041	0.7817	0.0443	0.7689	0.0417
0.6881	0.0936	0.7651	0.07	0.7463	0.0684	0.778	0.0533	0.776	0.0504	0.7562	0.0498	0.7586	0.0478	0.774	0.049	0.7633	0.0435	0.7669	0.0455	0.7733	0.0436	0.76	0.0444	0.7672	0.0432	0.7726	0.0453	0.7573	0.0447	0.758	0.0474	0.746	0.0444
0.656	0.0991	0.7412	0.0753	0.7227	0.0731	0.7546	0.0578	0.7531	0.0546	0.7334	0.0534	0.7356	0.0514	0.752	0.053	0.7412	0.0468	0.7438	0.0489	0.7518	0.0468	0.7375	0.0476	0.7451	0.0465	0.7489	0.0486	0.7341	0.048	0.7349	0.0502	0.7231	0.0469
0.6243	0.1038	0.7177	0.0801	0.6987	0.0777	0.7316	0.062	0.7306	0.0586	0.7103	0.0569	0.7123	0.0549	0.73	0.055	0.719	0.0499	0.7212	0.0521	0.7301	0.0498	0.7152	0.0506	0.7232	0.0496	0.724	0.0518	0.7116	0.051	0.7119	0.0529	0.7001	0.0493
0.5925	0.1081	0.6943	0.0846	0.6742	0.082	0.709	0.066	0.7084	0.0623	0.6868	0.0602	0.6886	0.0582	0.708	0.058	0.6964	0.0529	0.6988	0.0551	0.7081	0.0528	0.6928	0.0534	0.701	0.0525	0.7001	0.0546	0.6894	0.0537	0.689	0.0553	0.6772	0.0516
0.5604	0.1117	0.671	0.0889	0.6495	0.086	0.6866	0.0697	0.6862	0.0658	0.6631	0.0634	0.6648	0.0614	0.686	0.061	0.6734	0.0557	0.6764	0.0579	0.6856	0.0556	0.6703	0.0561	0.6786	0.0554	0.6769	0.0572	0.6673	0.0561	0.666	0.0576	0.6543	0.0538
0.5276	0.1149	0.6475	0.0928	0.6246	0.0897	0.6642	0.0732	0.6641	0.0691	0.6391	0.0664	0.6409	0.0643	0.663	0.063	0.6503	0.0585	0.654	0.0605	0.6629	0.0583	0.6475	0.0586	0.6558	0.058	0.6539	0.0595	0.645	0.0584	0.6429	0.0597	0.6313	0.0558
0.4941	0.1176	0.6238	0.0965	0.5997	0.0931	0.6417	0.0765	0.6417	0.0722	0.6151	0.0691	0.6172	0.067	0.641	0.065	0.627	0.061	0.6313	0.063	0.6403	0.0608	0.6244	0.0609	0.6326	0.0606	0.631	0.0617	0.6224	0.0605	0.6195	0.0616	0.6084	0.0577
0.4602	0.1197	0.5999	0.0999	0.5749	0.0961	0.619	0.0797	0.6193	0.0751	0.5911	0.0717	0.5935	0.0695	0.618	0.067	0.6037	0.0634	0.6084	0.0653	0.6176	0.0631	0.6011	0.0631	0.609	0.0629	0.6078	0.0637	0.5994	0.0624	0.5959	0.0634	0.5855	0.0595
0.4263	0.1212	0.5759	0.1031	0.5502	0.0987	0.596	0.0826	0.5966	0.0778	0.5672	0.074	0.5699	0.0718	0.595	0.069	0.5805	0.0656	0.5852	0.0674	0.5949	0.0652	0.5775	0.0651	0.5854	0.065	0.5842	0.0656	0.5758	0.0641	0.5721	0.065	0.5626	0.061
0.3928	0.122	0.5516	0.1059	0.5256	0.101	0.5728	0.0854	0.5737	0.0803	0.5434	0.076	0.5464	0.0739	0.572	0.071	0.5573	0.0676	0.5618	0.0694	0.5721	0.0671	0.5537	0.0669	0.5616	0.067	0.5602	0.0672	0.5516	0.0657	0.5481	0.0665	0.5397	0.0624
0.3601	0.122	0.5273	0.1084	0.5011	0.1029	0.5494	0.088	0.5507	0.0826	0.5197	0.0778	0.5229	0.0757	0.549	0.073	0.5343	0.0694	0.5383	0.0711	0.5494	0.0689	0.5299	0.0685	0.538	0.0687	0.5356	0.0688	0.5267	0.0671	0.524	0.0678	0.5168	0.0636
0.3284	0.1212	0.5029	0.1105	0.4766	0.1045	0.5258	0.0903	0.5276	0.0846	0.4961	0.0793	0.4995	0.0773	0.526	0.074	0.5112	0.071	0.5147	0.0727	0.5267	0.0704	0.5061	0.0699	0.5144	0.0702	0.5107	0.0701	0.5014	0.0683	0.4998	0.0689	0.4939	0.0647
0.2977	0.1197	0.4786	0.1123	0.4522	0.1056	0.5021	0.0923	0.5045	0.0863	0.4724	0.0806	0.4759	0.0786	0.503	0.075	0.4882	0.0724	0.4912	0.074	0.5042	0.0717	0.4823	0.071	0.4909	0.0714	0.4854	0.0712	0.4757	0.0693	0.4757	0.0698	0.4709	0.0656
0.2681	0.1174	0.4543	0.1138	0.4277	0.1064	0.4784	0.0941	0.4815	0.0879	0.4487	0.0816	0.4524	0.0797	0.48	0.076	0.4652	0.0736	0.4677	0.0751	0.4816	0.0728	0.4586	0.0719	0.4675	0.0724	0.46	0.0721	0.4499	0.0701	0.4515	0.0705	0.4479	0.0663
0.2395	0.1144	0.4301	0.1148	0.4032	0.1068	0.4548	0.0956	0.4584	0.0891	0.425	0.0823	0.4288	0.0806	0.457	0.077	0.4422	0.0745	0.4442	0.076	0.4591	0.0737	0.435	0.0726	0.4442	0.0732	0.4346	0.0728	0.424	0.0707	0.4275	0.071	0.425	0.0669
0.2119	0.1107	0.4059	0.1155	0.3787	0.1068	0.4312	0.0967	0.4355	0.09	0.4013	0.0827	0.4053	0.0812	0.434	0.077	0.4192	0.0753	0.4209	0.0766	0.4366	0.0744	0.4115	0.0731	0.4209	0.0737	0.4093	0.0732	0.3982	0.071	0.4035	0.0713	0.402	0.0674
0.1854	0.1062	0.3818	0.1158	0.3542	0.1063	0.4076	0.0976	0.4125	0.0907	0.3775	0.0828	0.3817	0.0815	0.411	0.078	0.3962	0.0758	0.3975	0.077	0.414	0.0749	0.3881	0.0733	0.3976	0.074	0.3842	0.0734	0.3726	0.0711	0.3796	0.0715	0.379	0.0677
0.1608	0.1011	0.3576	0.1156	0.3298	0.1054	0.3842	0.0981	0.3896	0.0911	0.3538	0.0826	0.3582	0.0816	0.388	0.078	0.3732	0.076	0.3742	0.0771	0.3914	0.0752	0.3646	0.0733	0.3743	0.074	0.3592	0.0733	0.3472	0.071	0.3557	0.0714	0.3561	0.0678
0.1386	0.0956	0.3335	0.115	0.3054	0.104	0.3608	0.0982	0.3667	0.0912	0.3302	0.0821	0.3347	0.0813	0.366	0.078	0.3502	0.076	0.351	0.0769	0.3688	0.0752	0.3413	0.073	0.351	0.0738	0.3344	0.073	0.322	0.0707	0.3319	0.0711	0.3333	0.0677
0.119	0.09	0.3094	0.1139	0.2812	0.1021	0.3376	0.0979	0.3438	0.0909	0.3067	0.0812	0.3113	0.0807	0.343	0.077	0.3272	0.0758	0.3277	0.0765	0.3462	0.075	0.3179	0.0724	0.3276	0.0732	0.3097	0.0724	0.2972	0.0701	0.3082	0.0706	0.3105	0.0673
0.1019	0.0845	0.2854	0.1123	0.2573	0.0998	0.3145	0.0972	0.3209	0.0903	0.2835	0.08	0.2879	0.0799	0.32	0.077	0.3043	0.0752	0.3045	0.0757	0.3237	0.0745	0.2946	0.0715	0.3043	0.0725	0.2851	0.0715	0.2726	0.0693	0.2846	0.0698	0.2878	0.0667
0.0871	0.0789	0.2617	0.1102	0.2337	0.0969	0.2915	0.0961	0.2981	0.0894	0.2606	0.0785	0.2647	0.0786	0.297	0.076	0.2814	0.0744	0.2813	0.0746	0.3012	0.0738	0.2713	0.0704	0.281	0.0714	0.2606	0.0703	0.2482	0.0682	0.261	0.0687	0.2652	0.0657
0.0742	0.0735	0.2382	0.1076	0.2103	0.0935	0.2685	0.0945	0.2753	0.0881	0.2379	0.0765	0.2415	0.077	0.275	0.075	0.2585	0.0732	0.2581	0.0732	0.2788	0.0728	0.248	0.0689	0.2578	0.07	0.2362	0.0688	0.224	0.0667	0.2375	0.0673	0.2427	0.0644
0.0629	0.0682	0.2151	0.1044	0.1873	0.0895	0.2457	0.0923	0.2526	0.0864	0.2154	0.0741	0.2185	0.075	0.252	0.073	0.2357	0.0717	0.2351	0.0714	0.2564	0.0715	0.2247	0.0671	0.2346	0.0683	0.2119	0.0669	0.1999	0.0649	0.214	0.0656	0.2202	0.0627
0.0529	0.0631	0.1924	0.1006	0.1644	0.085	0.223	0.0896	0.23	0.0844	0.193	0.0713	0.1957	0.0726	0.229	0.071	0.213	0.0698	0.2122	0.0692	0.2341	0.0698	0.2015	0.0649	0.2115	0.0663	0.1878	0.0647	0.1759	0.0626	0.1906	0.0636	0.1979	0.0607
0.0441	0.0582	0.1702	0.0962	0.1416	0.0797	0.2003	0.0863	0.2075	0.0818	0.1707	0.0679	0.173	0.0696	0.206	0.069	0.1904	0.0675	0.1895	0.0667	0.2119	0.0678	0.1785	0.0623	0.1884	0.0639	0.1641	0.062	0.1519	0.0598	0.1673	0.0611	0.1756	0.0582
0.0364	0.0535	0.1483	0.091	0.1189	0.0736	0.1778	0.0824	0.1852	0.0788	0.1482	0.064	0.1506	0.0662	0.184	0.066	0.1679	0.0648	0.1669	0.0637	0.1896	0.0655	0.1557	0.0593	0.1655	0.0611	0.1408	0.0588	0.128	0.0564	0.1442	0.0582	0.1534	0.0553
0.0295	0.0492	0.1267	0.0851	0.0969	0.0667	0.1555	0.0778	0.163	0.0752	0.1255	0.0594	0.1284	0.0622	0.161	0.063	0.1457	0.0616	0.1444	0.0602	0.1673	0.0626	0.1332	0.0558	0.1428	0.0578	0.118	0.0551	0.1046	0.0524	0.1212	0.0548	0.1313	0.052
0.0235	0.0451	0.1052	0.0782	0.0764	0.0592	0.1334	0.0724	0.141	0.071	0.103	0.054	0.1067	0.0576	0.139	0.06	0.1237	0.0578	0.1221	0.0561	0.145	0.0593	0.111	0.0517	0.1204	0.054	0.0959	0.0507	0.0822	0.0478	0.0986	0.0509	0.1093	0.0482
0.0183	0.0411	0.0843	0.0703	0.0581	0.0514	0.1117	0.0663	0.1192	0.0662	0.0816	0.048	0.0856	0.0523	0.117	0.055	0.1021	0.0534	0.0999	0.0514	0.1231	0.0554	0.0893	0.047	0.0984	0.0495	0.0747	0.0456	0.0617	0.0426	0.0769	0.0461	0.0875	0.0439
0.0138	0.037	0.0648	0.0614	0.0423	0.0435	0.0907	0.0594	0.098	0.0606	0.0621	0.0415	0.0654	0.0462	0.095	0.051	0.0808	0.0483	0.0783	0.046	0.1016	0.051	0.0681	0.0414	0.077	0.0444	0.0555	0.0399	0.0441	0.0369	0.0568	0.0404	0.0666	0.0392
0.0099	0.0329	0.0476	0.0521	0.0291	0.0355	0.0706	0.0517	0.0777	0.0543	0.0439	0.0343	0.0467	0.0393	0.075	0.045	0.0603	0.0422	0.0579	0.0398	0.0807	0.0459	0.0482	0.035	0.0566	0.0385	0.0394	0.0339	0.0302	0.0313	0.0389	0.0338	0.0476	0.0338
0.0068	0.0287	0.0331	0.0426	0.0193	0.0284	0.0513	0.0431	0.0581	0.0469	0.0272	0.0261	0.0302	0.0317	0.055	0.038	0.0413	0.0353	0.0391	0.0328	0.0604	0.0398	0.0311	0.0279	0.0383	0.032	0.0268	0.0279	0.0198	0.0263	0.024	0.0266	0.0306	0.0272
0.0043	0.0244	0.0209	0.0326	0.0127	0.0225	0.0339	0.0336	0.0398	0.0383	0.0163	0.0193	0.0177	0.0243	0.036	0.03	0.025	0.0276	0.0235	0.0253	0.0407	0.0325	0.0184	0.0211	0.0231	0.0249	0.0176	0.0224	0.0125	0.0213	0.0144	0.0204	0.018	0.0206
0.0024	0.0201	0.0124	0.0238	0.0081	0.0176	0.0198	0.0241	0.0247	0.0291	0.0096	0.014	0.0099	0.0182	0.02	0.022	0.0134	0.0202	0.0128	0.0186	0.0237	0.0244	0.0103	0.0152	0.013	0.0186	0.0114	0.0176	0.0076	0.0166	0.0087	0.0155	0.0097	0.014
0.0011	0.0157	0.0073	0.0171	0.005	0.0133	0.0104	0.0161	0.0124	0.019	0.0051	0.0094	0.0053	0.0134	0.009	0.013	0.0066	0.0141	0.0066	0.0132	0.0108	0.0155	0.0054	0.0104	0.0071	0.0135	0.0071	0.0132	0.0043	0.0123	0.0049	0.0106	0.0046	0.009
0.0003	0.0113	0.0043	0.0116	0.0027	0.0094	0.0052	0.0103	0.006	0.0115	0.0023	0.0056	0.0027	0.0093	0.004	0.007	0.0029	0.0094	0.0031	0.009	0.0044	0.0086	0.0027	0.0064	0.0034	0.009	0.0039	0.0091	0.0022	0.0086	0.0024	0.0068	0.0018	0.0054
0	0.007	0.0022	0.0069	0.0011	0.0059	0.002	0.0055	0.0027	0.0061	0.0007	0.0026	0.001	0.0054	0.001	0.003	0.0012	0.0056	0.0011	0.0054	0.0012	0.003	0.001	0.0029	0.0012	0.0053	0.0018	0.0057	0.0008	0.0054	0.0008	0.0027	0.0004	0.0026
0.0001	0.0027	0.0007	0.0031	0.0002	0.0028	0.0004	0.0024	0.0007	0.0025	0	0	0.0001	0.0006	0	0	0.0001	0.0025	0	0.0025	0	0	0	0	0.0001	0.0024	0.0005	0.0027	0.0001	0.0026	0	0	0	0
0.0007	-0.0016	0	0	0	0	0	0	0	0	0.0002	-0.0024	0	0	0	-0.002	0	0	0	0	0.0004	-0.0009	0.0001	-0.0025	0	0	0	0	0	0	0.0002	-0.0009	0.0009	-0.0024
0.0017	-0.0059	0.0002	-0.0025	0.0006	-0.0027	0.0007	-0.0032	0.0006	-0.0023	0.0014	-0.0048	0.0011	-0.003	0.002	-0.004	0.0014	-0.0022	0.0012	-0.0025	0.0027	-0.0045	0.0014	-0.005	0.0011	-0.0022	0.0002	-0.0027	0.0005	-0.0023	0.0016	-0.004	0.0033	-0.0046
0.0032	-0.0101	0.0014	-0.0047	0.002	-0.0052	0.0027	-0.0045	0.0028	-0.0045	0.0036	-0.0071	0.0035	-0.004	0.005	-0.007	0.0043	-0.0042	0.0038	-0.0048	0.0074	-0.0076	0.0039	-0.0073	0.0036	-0.0045	0.0014	-0.0053	0.0018	-0.0043	0.0041	-0.0061	0.007	-0.0068
0.0052	-0.0143	0.0038	-0.0065	0.0043	-0.0075	0.0065	-0.0062	0.007	-0.0059	0.0071	-0.0091	0.0072	-0.0059	0.011	-0.01	0.0091	-0.0059	0.0079	-0.0068	0.0159	-0.0097	0.0077	-0.0092	0.0076	-0.0066	0.0037	-0.0075	0.0038	-0.0061	0.0081	-0.0078	0.0126	-0.0089
0.0077	-0.0184	0.0076	-0.008	0.0076	-0.0093	0.0129	-0.007	0.0147	-0.0071	0.0123	-0.0103	0.0123	-0.0072	0.023	-0.012	0.0169	-0.0073	0.0143	-0.0084	0.0326	-0.0102	0.0136	-0.0107	0.0136	-0.0083	0.0069	-0.0092	0.0066	-0.0077	0.0137	-0.0092	0.0212	-0.01
0.0107	-0.0222	0.0128	-0.0091	0.0118	-0.0105	0.0236	-0.0073	0.0298	-0.0074	0.0203	-0.0113	0.0203	-0.008	0.041	-0.012	0.0304	-0.0083	0.0247	-0.0094	0.054	-0.009	0.0229	-0.0117	0.0231	-0.0095	0.0114	-0.0104	0.0106	-0.0092	0.0226	-0.0102	0.0347	-0.0092
0.0144	-0.0258	0.0207	-0.0098	0.0173	-0.0112	0.0413	-0.0066	0.0511	-0.0067	0.0326	-0.0118	0.0337	-0.0083	0.062	-0.012	0.0499	-0.0084	0.0414	-0.0096	0.0767	-0.0071	0.0374	-0.0119	0.0394	-0.0098	0.0176	-0.0114	0.0163	-0.0105	0.0377	-0.0106	0.054	-0.008
0.0186	-0.029	0.0335	-0.0104	0.0246	-0.0116	0.0634	-0.0048	0.0735	-0.0052	0.0509	-0.0114	0.0532	-0.0076	0.085	-0.01	0.0719	-0.0076	0.0625	-0.0086	0.0992	-0.005	0.0582	-0.0107	0.0601	-0.0089	0.0265	-0.0119	0.0251	-0.0114	0.057	-0.0101	0.0759	-0.0073
0.0235	-0.0318	0.0521	-0.0103	0.0347	-0.0114	0.0863	-0.0025	0.0967	-0.0032	0.0735	-0.0101	0.0759	-0.0061	0.108	-0.008	0.0947	-0.0063	0.0853	-0.007	0.1217	-0.003	0.0808	-0.0088	0.0828	-0.0072	0.0403	-0.0118	0.039	-0.0107	0.0785	-0.0088	0.0977	-0.006
0.0289	-0.0344	0.0749	-0.0093	0.0494	-0.0106	0.11	0	0.1198	-0.0012	0.0965	-0.0083	0.0997	-0.0042	0.131	-0.006	0.1177	-0.0047	0.1088	-0.005	0.1445	-0.001	0.1039	-0.0066	0.1064	-0.0052	0.0597	-0.0107	0.0539	-0.0094	0.1021	-0.0071	0.1203	-0.0042
0.0349	-0.0367	0.099	-0.0079	0.0683	-0.0089	0.1339	0.0026	0.143	0.001	0.1202	-0.0061	0.1237	-0.0021	0.153	-0.004	0.1409	-0.0029	0.1324	-0.003	0.1672	0.001	0.1277	-0.0042	0.1302	-0.003	0.0823	-0.009	0.0719	-0.0084	0.1263	-0.0052	0.143	-0.0022
0.0416	-0.0386	0.1237	-0.0062	0.0907	-0.0065	0.1578	0.005	0.1663	0.0032	0.1444	-0.0039	0.1478	-0.0001	0.177	-0.002	0.1643	-0.0011	0.1561	-0.0009	0.1899	0.0028	0.1515	-0.0018	0.1539	-0.0009	0.107	-0.0069	0.0964	-0.0072	0.1504	-0.0033	0.1655	-0.0005
0.0489	-0.04	0.1485	-0.0044	0.1153	-0.0039	0.1817	0.0074	0.1896	0.0054	0.1686	-0.0015	0.1718	0.002	0.2	0	0.1876	0.0008	0.1797	0.0011	0.2126	0.0045	0.1751	0.0005	0.1776	0.0012	0.1324	-0.0047	0.1209	-0.0057	0.1743	-0.0013	0.188	0.0008
0.0572	-0.0409	0.1735	-0.0024	0.1405	-0.0012	0.2055	0.0096	0.2128	0.0075	0.1927	0.0008	0.1958	0.0041	0.223	0.002	0.211	0.0026	0.2032	0.003	0.2352	0.0061	0.1986	0.0026	0.2012	0.0031	0.1578	-0.0024	0.1448	-0.0041	0.1983	0.0005	0.2108	0.0018
0.0667	-0.0414	0.1986	-0.0003	0.166	0.0015	0.2293	0.0116	0.236	0.0096	0.2168	0.0031	0.2197	0.0061	0.246	0.004	0.2343	0.0044	0.2267	0.0048	0.258	0.0076	0.2222	0.0045	0.2248	0.005	0.1829	-0.0003	0.1697	-0.0023	0.2223	0.0023	0.2337	0.0026
0.0781	-0.0415	0.2237	0.0017	0.1915	0.0041	0.2531	0.0134	0.2592	0.0116	0.2409	0.0053	0.2437	0.008	0.269	0.006	0.2576	0.0061	0.2502	0.0066	0.2807	0.009	0.2458	0.0063	0.2483	0.0067	0.2079	0.0017	0.1952	-0.0005	0.2465	0.004	0.2568	0.0033
0.0919	-0.0415	0.2488	0.0037	0.217	0.0066	0.2769	0.0151	0.2824	0.0135	0.265	0.0075	0.2676	0.0099	0.292	0.008	0.2808	0.0078	0.2737	0.0082	0.3034	0.0103	0.2694	0.008	0.2719	0.0083	0.2328	0.0036	0.2207	0.0012	0.2706	0.0055	0.28	0.0039
0.1084	-0.0414	0.2739	0.0056	0.2424	0.009	0.3006	0.0165	0.3056	0.0154	0.2891	0.0096	0.2915	0.0116	0.315	0.009	0.304	0.0094	0.2973	0.0096	0.3262	0.0115	0.2931	0.0095	0.2955	0.0098	0.2578	0.0053	0.2464	0.0029	0.2947	0.0069	0.3031	0.0047
0.1279	-0.0409	0.2989	0.0075	0.2679	0.0112	0.3244	0.0178	0.3288	0.0172	0.3131	0.0116	0.3155	0.0133	0.338	0.011	0.3272	0.0108	0.3208	0.011	0.3489	0.0126	0.3168	0.0109	0.3191	0.0111	0.2829	0.0069	0.2717	0.0044	0.3188	0.0082	0.3264	0.0054
0.1507	-0.04	0.3239	0.0092	0.2933	0.0133	0.3482	0.0189	0.3519	0.0188	0.3371	0.0135	0.3394	0.0149	0.361	0.013	0.3505	0.0122	0.3444	0.0122	0.3717	0.0135	0.3404	0.0121	0.3427	0.0123	0.308	0.0084	0.2969	0.0058	0.3428	0.0093	0.3496	0.0062
0.1776	-0.0386	0.3488	0.0108	0.3187	0.0153	0.3719	0.0199	0.3751	0.0204	0.3611	0.0153	0.3634	0.0164	0.384	0.014	0.3737	0.0134	0.368	0.0133	0.3945	0.0144	0.3641	0.0131	0.3663	0.0134	0.3332	0.0097	0.3221	0.0071	0.3668	0.0103	0.3728	0.007
0.2091	-0.0367	0.3737	0.0123	0.3442	0.0171	0.3957	0.0207	0.3983	0.0218	0.3851	0.0169	0.3873	0.0178	0.407	0.015	0.3969	0.0145	0.3915	0.0143	0.4172	0.0152	0.3878	0.0141	0.39	0.0143	0.3583	0.0108	0.3475	0.0083	0.3908	0.0112	0.3959	0.0077
0.2447	-0.0345	0.3985	0.0137	0.3696	0.0188	0.4194	0.0213	0.4215	0.0231	0.4091	0.0185	0.4113	0.019	0.43	0.016	0.4201	0.0155	0.4151	0.0152	0.44	0.0158	0.4115	0.0149	0.4136	0.0151	0.3834	0.0119	0.373	0.0093	0.4148	0.012	0.4189	0.0083
0.2825	-0.0322	0.4234	0.0149	0.3951	0.0204	0.4432	0.0218	0.4446	0.0242	0.4331	0.0199	0.4352	0.0202	0.453	0.017	0.4433	0.0163	0.4387	0.0159	0.4628	0.0164	0.4352	0.0155	0.4373	0.0158	0.4084	0.0128	0.3985	0.0102	0.4388	0.0126	0.4419	0.0087
0.321	-0.03	0.4482	0.016	0.4205	0.0218	0.467	0.0222	0.4678	0.0253	0.4571	0.0212	0.4592	0.0212	0.476	0.018	0.4665	0.017	0.4624	0.0166	0.4857	0.0169	0.459	0.0161	0.461	0.0163	0.4334	0.0135	0.4239	0.0109	0.4629	0.0132	0.4649	0.009
0.3597	-0.0278	0.473	0.0169	0.446	0.0231	0.4908	0.0225	0.4909	0.0262	0.4811	0.0223	0.4831	0.0222	0.499	0.019	0.4897	0.0176	0.486	0.0171	0.5085	0.0172	0.4827	0.0165	0.4847	0.0167	0.4584	0.0142	0.4493	0.0116	0.487	0.0136	0.4878	0.0091
0.3983	-0.0258	0.4978	0.0176	0.4714	0.0242	0.5145	0.0226	0.5141	0.0269	0.5051	0.0233	0.507	0.023	0.522	0.02	0.5129	0.0181	0.5096	0.0176	0.5313	0.0175	0.5065	0.0168	0.5083	0.017	0.4833	0.0147	0.4747	0.012	0.5111	0.0139	0.5109	0.0091
0.4367	-0.024	0.5225	0.0181	0.4968	0.0252	0.5383	0.0226	0.5372	0.0275	0.529	0.0242	0.531	0.0236	0.545	0.021	0.5361	0.0184	0.5333	0.0179	0.5541	0.0177	0.5303	0.017	0.532	0.0172	0.5083	0.015	0.5	0.0124	0.5354	0.0141	0.5341	0.009
0.4749	-0.0225	0.5472	0.0184	0.5222	0.026	0.5619	0.0226	0.5604	0.0279	0.553	0.0249	0.5549	0.0241	0.568	0.021	0.5594	0.0186	0.5569	0.0181	0.5769	0.0177	0.5541	0.0171	0.5556	0.0173	0.5332	0.0153	0.5253	0.0126	0.5596	0.0141	0.5572	0.0088
0.5132	-0.0212	0.5719	0.0186	0.5476	0.0266	0.5856	0.0224	0.5835	0.0282	0.577	0.0254	0.5788	0.0245	0.591	0.021	0.5826	0.0186	0.5805	0.0183	0.5996	0.0177	0.5778	0.0171	0.5792	0.0172	0.5583	0.0154	0.5507	0.0127	0.584	0.0141	0.5805	0.0086
0.5518	-0.0201	0.5966	0.0185	0.573	0.0271	0.6092	0.022	0.6067	0.0283	0.6009	0.0257	0.6027	0.0247	0.614	0.022	0.6058	0.0185	0.604	0.0183	0.6223	0.0176	0.6016	0.017	0.6028	0.0171	0.5834	0.0154	0.5761	0.0127	0.6082	0.014	0.6037	0.0083
0.5914	-0.0192	0.6214	0.0183	0.5983	0.0274	0.6329	0.0216	0.6298	0.0282	0.6248	0.0259	0.6265	0.0247	0.637	0.022	0.629	0.0183	0.6276	0.0183	0.645	0.0174	0.6253	0.0168	0.6263	0.0168	0.6088	0.0153	0.6016	0.0126	0.6325	0.0137	0.627	0.0081
0.6316	-0.0187	0.6462	0.0178	0.6236	0.0275	0.6567	0.0211	0.653	0.0279	0.6486	0.0259	0.6503	0.0246	0.66	0.022	0.6522	0.0179	0.6511	0.0181	0.6678	0.017	0.6491	0.0165	0.65	0.0164	0.6343	0.0151	0.6273	0.0124	0.6565	0.0134	0.6502	0.0078
0.6716	-0.0186	0.6711	0.0171	0.6489	0.0274	0.6807	0.0204	0.676	0.0275	0.6724	0.0257	0.674	0.0243	0.683	0.021	0.6754	0.0174	0.6747	0.0178	0.6906	0.0166	0.6729	0.0161	0.6737	0.0159	0.6598	0.0148	0.6531	0.012	0.6804	0.013	0.6734	0.0075
0.7097	-0.0189	0.6959	0.0163	0.6741	0.0271	0.7047	0.0197	0.699	0.0268	0.6962	0.0253	0.6978	0.0238	0.706	0.021	0.6986	0.0168	0.6984	0.0174	0.7134	0.0161	0.6968	0.0157	0.6976	0.0153	0.6852	0.0143	0.6788	0.0116	0.7041	0.0125	0.6967	0.0072
0.7448	-0.0195	0.7206	0.0152	0.6993	0.0266	0.7286	0.0188	0.7219	0.026	0.7201	0.0246	0.7216	0.0231	0.729	0.021	0.7219	0.0161	0.7222	0.0169	0.7362	0.0154	0.7208	0.0151	0.7214	0.0147	0.7106	0.0138	0.7044	0.011	0.7277	0.0119	0.7199	0.0069
0.7765	-0.0202	0.7451	0.014	0.7245	0.0258	0.7526	0.0178	0.7448	0.0249	0.744	0.0238	0.7456	0.0221	0.752	0.02	0.7452	0.0152	0.746	0.0163	0.759	0.0147	0.7448	0.0144	0.7451	0.0139	0.736	0.0131	0.7301	0.0104	0.7512	0.0113	0.7431	0.0065
0.8058	-0.0209	0.7694	0.0126	0.7496	0.0248	0.7764	0.0167	0.7678	0.0237	0.7679	0.0227	0.7696	0.021	0.776	0.019	0.7686	0.0143	0.7697	0.0155	0.7817	0.0139	0.7686	0.0136	0.7688	0.013	0.761	0.0123	0.7558	0.0096	0.7749	0.0106	0.7663	0.0061
0.8339	-0.0214	0.7938	0.011	0.7746	0.0236	0.7995	0.0155	0.7909	0.0222	0.7918	0.0214	0.7935	0.0197	0.799	0.018	0.7919	0.0132	0.7935	0.0147	0.8045	0.0129	0.7922	0.0127	0.7926	0.012	0.7852	0.0115	0.7812	0.0089	0.7989	0.0097	0.7896	0.0057
0.8625	-0.0215	0.8183	0.0093	0.7995	0.0221	0.8222	0.0142	0.8142	0.0205	0.8154	0.0198	0.817	0.0181	0.821	0.017	0.8153	0.012	0.8171	0.0137	0.827	0.0119	0.8155	0.0118	0.8159	0.011	0.809	0.0106	0.8061	0.008	0.8229	0.0088	0.8128	0.0053
0.893	-0.0215	0.8433	0.0075	0.8244	0.0203	0.8447	0.0129	0.8375	0.0186	0.8387	0.018	0.84	0.0164	0.844	0.015	0.8386	0.0108	0.8403	0.0126	0.8491	0.0107	0.8387	0.0107	0.8387	0.0099	0.8324	0.0096	0.8305	0.0071	0.8462	0.0079	0.836	0.0048
0.9205	-0.0218	0.8679	0.0057	0.8494	0.0182	0.8677	0.0113	0.8606	0.0165	0.8618	0.0161	0.8628	0.0145	0.865	0.014	0.8616	0.0094	0.8633	0.0114	0.8714	0.0095	0.862	0.0095	0.8611	0.0087	0.856	0.0085	0.8552	0.0062	0.8691	0.0069	0.8591	0.0042
0.9406	-0.0224	0.8924	0.0039	0.8742	0.0159	0.8909	0.0097	0.8832	0.0143	0.8853	0.0138	0.8859	0.0124	0.887	0.012	0.8844	0.008	0.8862	0.0099	0.8939	0.0081	0.8857	0.0083	0.8835	0.0075	0.8802	0.0073	0.8805	0.0052	0.8923	0.0059	0.8823	0.0036
0.9552	-0.0227	0.9171	0.0024	0.8987	0.0133	0.9125	0.008	0.9054	0.0119	0.9091	0.0112	0.9094	0.0101	0.91	0.01	0.9074	0.0066	0.9093	0.0082	0.9153	0.0067	0.9087	0.0069	0.9065	0.0062	0.9051	0.006	0.905	0.0042	0.9161	0.0047	0.9055	0.003
0.9668	-0.0219	0.9397	0.0014	0.923	0.0105	0.9336	0.0062	0.9276	0.0094	0.9324	0.0086	0.9318	0.0077	0.932	0.008	0.9303	0.005	0.9328	0.0062	0.9366	0.0052	0.9318	0.0054	0.9298	0.0047	0.9288	0.0047	0.9288	0.0032	0.9382	0.0035	0.9285	0.0023
0.9766	-0.0197	0.9594	0.0007	0.9478	0.0073	0.9559	0.0043	0.9502	0.0066	0.9555	0.0058	0.9546	0.0052	0.954	0.006	0.953	0.0034	0.9551	0.0042	0.9584	0.0035	0.9545	0.0037	0.9525	0.0033	0.9531	0.0032	0.9533	0.0021	0.9578	0.0025	0.9505	0.0017
0.9854	-0.0156	0.9766	0.0003	0.9716	0.0041	0.9759	0.0024	0.9724	0.0037	0.975	0.0033	0.9753	0.0029	0.975	0.003	0.9738	0.0019	0.9744	0.0024	0.9767	0.002	0.9741	0.0022	0.9742	0.0018	0.9745	0.0018	0.9744	0.0011	0.9751	0.0015	0.9724	0.0014
0.9938	-0.0085	0.9916	0.0001	0.9903	0.0014	0.9914	0.0009	0.9907	0.0013	0.9909	0.0012	0.9912	0.001	0.991	0.001	0.9906	0.0007	0.9906	0.0009	0.9915	0.0008	0.9905	0.0008	0.991	0.0006	0.991	0.0006	0.9908	0.0004	0.9906	0.0006	0.9908	0.0007
1	0	1	0	1	0	1	0	1	0	1	0	1	0	1	0	1	0	1	0	1	0	1	0	1	0	1	0	1	0	1	0	1	0
